# Supplementary material for: Novel optoelectronic metal organic framework material perylene tetracarboxylate magnesium: preparation and biosensing
Source: Royal Society of Chemistry journal article supplement (doi:10.1039/d1nr03300j), 2021-01-01
Supplement: d1nr03300j1.pdf [file d1nr03300j1.pdf]

1 *Electronic Supplementary Information*

2 **Novel optoelectronic metal organic framework material perylene**  
3 **tetracarboxylate magnesium: preparation and biosensing**

4 Fangjing Mo, Qian Han, Min Chen, Hui Meng, Jiang Guo, Yingzi Fu\*

5 *Key Laboratory of Luminescence Analysis and Molecular Sensing (Southwest*  
6 *University), Ministry of Education, School of Chemistry and Chemical Engineering,*  
7 *Southwest University, Chongqing 400715, China.*

8

9 \*Corresponding author: Tel: +86-023-68252277, E-mail address: [fyzc@swu.edu.cn](mailto:fyzc@swu.edu.cn)  
10

## Table of Contents

|    |                                                                                       |            |
|----|---------------------------------------------------------------------------------------|------------|
| 12 | <b>1. Materials and reagents .....</b>                                                | <b>S3</b>  |
| 13 | <b>2. Instrumentations .....</b>                                                      | <b>S3</b>  |
| 14 | <b>3. Synthesis of PTCA .....</b>                                                     | <b>S5</b>  |
| 15 | <b>4. SEM images of MBs and MBs-H1 .....</b>                                          | <b>S6</b>  |
| 16 | <b>5. SEM images of ZnO NPs, ZnO NPs-H2 and ZnO NPs-H2-Au NCs .....</b>               | <b>S7</b>  |
| 17 | <b>6. XPS analysis of PTCA MOFs .....</b>                                             | <b>S8</b>  |
| 18 | <b>7. FTIR analysis of PTCA MOFs .....</b>                                            | <b>S9</b>  |
| 19 | <b>8. Electrochemical data and calculated energy levels.....</b>                      | <b>S10</b> |
| 20 | <b>9. PEC and Electrochemical responses of the stepwise modified electrodes .....</b> | <b>S11</b> |
| 21 | <b>10. Condition optimization .....</b>                                               | <b>S11</b> |
| 22 | <b>11. The effect of ZnO NPs and HNO<sub>3</sub> .....</b>                            | <b>S14</b> |
| 23 | <b>12. Comparison with other methods for miRNA 21 detection.....</b>                  | <b>S16</b> |
| 24 | <b>13. Reference .....</b>                                                            | <b>S17</b> |

## 26 **1. Materials and reagents**

27 tetrabutylammonium hexafluorophosphate (TBAPF<sub>6</sub>), N-hydroxy succinimide  
28 (NHS) and N-(3-dimethylaminopropyl)-N-ethylcarbodiimide hydrochloride (EDC)  
29 were purchased from J&K Chemical Co. (Beijing, China). Ferrocene (Fc),  
30 dimethylamine borane (DMAB) and nitric acid (HNO<sub>3</sub>) were bought from Shanghai  
31 Macklin Biochemical Co., Ltd. Aminated zinc oxide nanoparticles (ZnO NPs), *N,N*-  
32 dimethylformamide (DMF) and dioxane were gained from Aladdin Reagent Co. Ltd.  
33 (Shanghai, China). Ascorbic acid (AA, 99%) and 6-mercapto-1-hexanol (MCH) were  
34 got from Sigma-Aldrich (St. Louis, MO, USA). K<sub>4</sub>Fe(CN)<sub>6</sub> and K<sub>3</sub>Fe(CN)<sub>6</sub> were  
35 contained in 5 mM [Fe(CN)<sub>6</sub>]<sup>3-/4-</sup> solution. 0.1 M Phosphate buffer (PB, pH 7.4) was  
36 prepared by the buffer pair of Na<sub>2</sub>HPO<sub>4</sub> and KH<sub>2</sub>PO<sub>4</sub>, including 0.1 M KCl as  
37 supporting electrolyte. Other reagents used through the whole work were of analytical  
38 grade. TE buffer (10 mM Tris-HCl, 1 mM ethylenediaminetetraacetic acid (EDTA), pH  
39 8.0) was used for the storage of all the oligonucleotides. STE buffer (10 mM Tris-HCl,  
40 150 mM NaCl, 1 mM EDTA, pH 8.0) was used as the reaction buffer for the reaction  
41 of oligonucleotides. All hairpin DNA were heated at 95 °C for 5 min and then slowly  
42 cooled down to 25 °C for annealing before use.

## 43 **2. Instrumentations**

44 Electrochemical impedance spectroscopy (EIS) was recorded via CHI 604D  
45 electrochemistry workstation (Shanghai Chenhua Instrument Co., China). PEC  
46 measurements were performed via CHI 440A electrochemical workstation, which was

47 configured with PEAC 200A (Tianjin AiDa Hengsheng Technology Co., Ltd., China)  
48 for visible-light excitation. Polyacrylamide gel electrophoresis (PAGE) were carried  
49 out on the DYCP-31E electrophoresis apparatus (WoDeLife Sciences Instrument Co.,  
50 Ltd., China). A three-electrode system was built for signal collection. To be specific, a  
51 modified glassy carbon electrode (GCE,  $\Phi = 4$  mm), a platinum wire and an Ag/AgCl  
52 (sat. KCl) were employed as the working electrode, the auxiliary electrode and the  
53 reference electrode, respectively. The surface morphologies and element components  
54 of nanomaterials were recorded by scanning electron microscope (SEM, JSM-7800 F,  
55 JEOL Ltd, Tokyo, Japan) coupled with an Oxford-INCA energy dispersive X-ray  
56 spectroscopy (EDX). Transmission electron microscopy (TEM, FEI Co., America) was  
57 also used to record the appearances of these materials via a Tecnai G2 F20 transmission  
58 electron microscope operating at an accelerating voltage of 200 KV (FEI, America).  
59 Atomic force microscopy (AFM, Bruker Co. Germany) was utilized to characterize the  
60 morphologies and thick of materials. Spectral measurements were performed via  
61 Fourier transform infrared spectrometer (FTIR, Nicolet IS10, ThermoFisher Scientific,  
62 USA), F7000 fluorescence spectrophotometer (FL, Hitachi High-TechScience Co.,  
63 Tokyo, Japan), UV-2600 UV-vis spectrophotometer (UV-Vis, Shimadzu, Japan) and  
64 X-ray photoelectron spectrum (XPS) with a VG Scientific ESCALAB 250 spectrometer  
65 (Thermoelectricity Instruments, USA). All the experiments were performed at  $25 \pm 1$   
66 °C.  
67

### 68 **3. Synthesis of PTCA**

69 PTCA was synthesized according to previous report<sup>1</sup> with slight modification. First,  
70 51.4 mg PTCDA was dissolved in 20 mL of KOH (5%) under stirring at 65 °C. Later,  
71 the reaction solution was cooled down to 25 °C, and HCl (0.9 M) was added dropwise  
72 until an orange-red precipitate was observed. Finally, an orange-red precipitate was  
73 obtained. The precipitate was centrifuged and collected at 4 °C for future use.

74

75 **4. SEM images of MBs and MBs-H1**

76

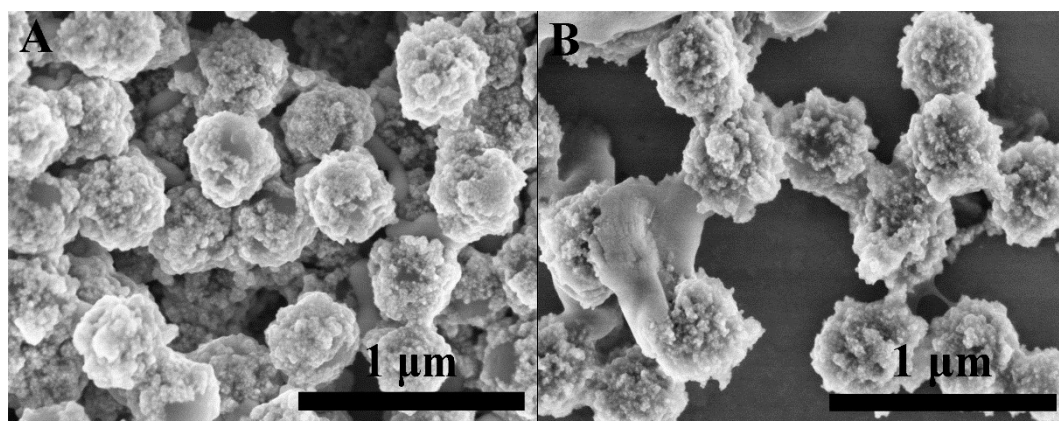

77

78

**Fig. S1.** SEM images of (A) MBs (B) MBs-H1 (insert: partial enlarged image).

79

80 **5. SEM images of ZnO NPs, ZnO NPs-H2 and ZnO NPs-H2-Au NCs**

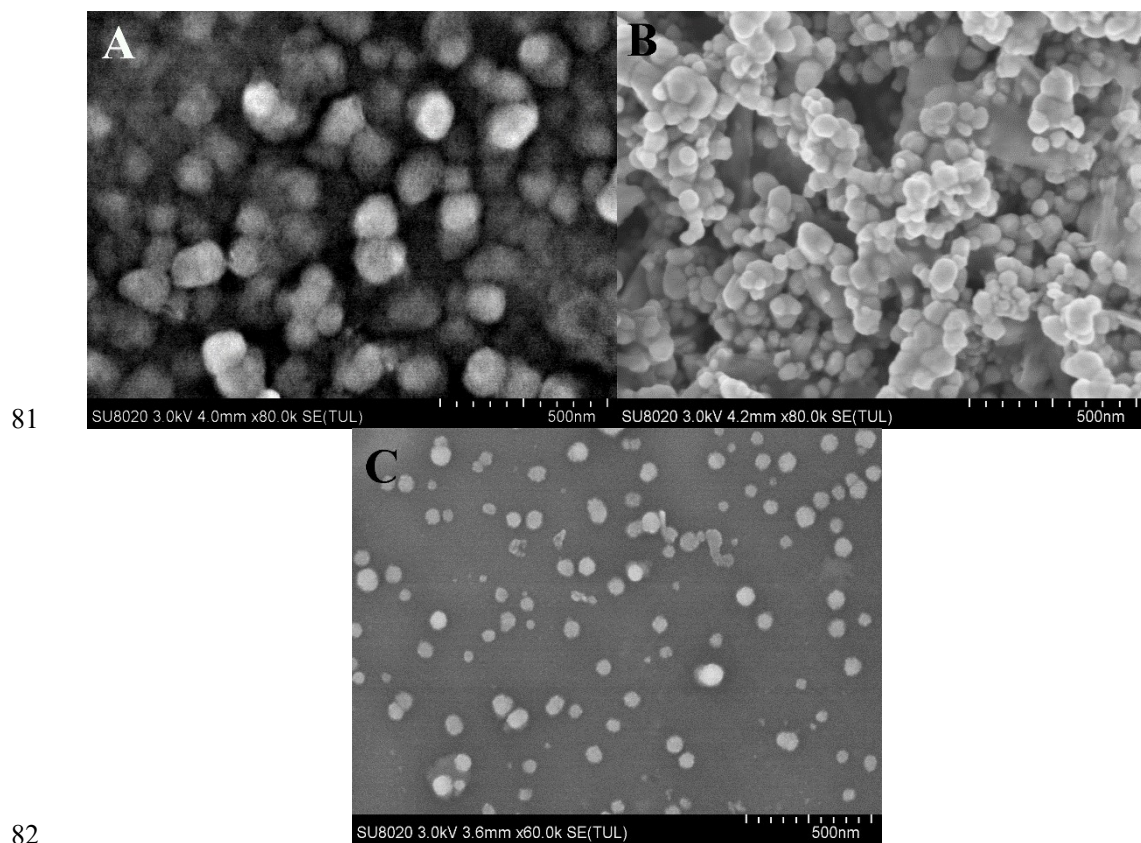

83 **Fig. S2.** SEM images of (A) ZnO NPs, (B) the complex of aminated zinc oxide nanoparticles and  
84 carboxyl-hairpin DNA2 (ZnO NPs-H2) and (C) the complex of aminated zinc oxide nanoparticles,  
85 carboxyl-hairpin DNA2 and AS@Au NCs (ZnO NPs - H2 - AS@Au NCs).

87 **6. XPS analysis of PTCA MOFs**

88

**Table S1.** XPS analysis of PTCA MOFs.

| Bonding situation    | Binding energy (eV) | Atomic % |
|----------------------|---------------------|----------|
| C-C (C 1s)           | 284.73              | 79.28    |
| C=O (C 1s)           | 288.48              | 12.83    |
| $\pi$ - $\pi$ (C 1s) | 290.05              | 6.17     |
| C-O (C 1s)           | 286.60              | 1.72     |
| O-Mg (O 1s)          | 531.46              | 59.72    |
| O-C (O 1s)           | 533.43              | 40.28    |
| Mg-O (Mg 1s)         | 1304.21             | 100      |

89

90



91 **7. FTIR analysis of PTCA MOFs**

92

**Table S2.** FTIR analysis of PTCA MOFs.

| Wavelength / $\text{cm}^{-1}$ | Mode of vibration                      |
|-------------------------------|----------------------------------------|
| 3440                          | stretching vibration of -OH            |
| 3120, 3100                    | stretching vibration of C-H in benzene |
| 1774, 1743                    | stretching vibration of carbonyl       |
| 1594, 1564, 1508, 1461, 1406  | skeleton vibration of aromatic ring    |
| 1236, 1147, 1121, 1024        | stretching vibration of C-O            |
| 774                           | bending vibration of C=O               |
| 792, 734                      | bending vibration of C-H               |

93

94

## 95 8. Electrochemical data and calculated energy levels

96

**Table S3.** Electrochemical data and calculated energy levels.

| Porphyrins dots | $E_{\text{ox}} / \text{eV}$ | $E_{\text{g}} / \text{eV}$ | $E_{\text{HOMO}} / \text{eV}$ | $E_{\text{LUMO}} / \text{eV}$ |
|-----------------|-----------------------------|----------------------------|-------------------------------|-------------------------------|
| PTCA            | 1.08                        | 1.92                       | -5.48                         | -3.56                         |
| Mg-PTCA MOFs    | 1.10                        | 1.50                       | -5.50                         | -4.00                         |

97

98

## 99 **9. PEC and Electrochemical responses of the stepwise modified electrodes**

100 The photocurrent changes of different modified electrodes are showed in Fig. S3A.  
101 The photocurrent obtained from bared GCE is close to zero (curve a). After modifying  
102 the photoelectric material Mg-PTCA MOFs on bared GCE, a much higher photocurrent  
103 about 40  $\mu\text{A}$  is gained (curve b). With the reaction between capture DNA and Mg-  
104 PTCA MOFs through amide bonds, the decreased PEC signal is observed (curve c).  
105 Then the photocurrent further decreases after the incubation of MCH and AS @ Au  
106 NCs successively (curve d and e). Finally, with the help of regeneration DNA, the  
107 photocurrent is recovered close to the previous step (curve f). Fig. S3B exhibits the EIS  
108 behaviors of stepwise modified electrodes. After coating the bared GCE with Mg-  
109 PTCA MOFs, the increased charge-transfer resistance ( $R_{\text{et}}$ ) is obtained (curve a and b).  
110 With the stepwise modification of capture DNA, MCH and AS @ Au NCs,  $R_{\text{et}}$  increases  
111 sequentially (curve c to e). Along with the incubation of regeneration DNA,  $R_{\text{et}}$   
112 decreases contributing to the hybrid of regeneration DNA and AS, which makes AS @  
113 Au NCs away from the electrode surface (curve f).

## 114 **10. Condition optimization**

115 The PEC signals towards 100 fM miRNA 21 in various pH detection solutions are  
116 shown in Fig. S3C. The photocurrent decreases with the increase of the pH value until  
117 pH 7.4, so pH 7.4 was selected as an optimized value. As illustrated in Fig. S3D, the  
118 incubation time of AS@Au NCs was also investigated. The photocurrent drops  
119 accordingly with the extension of the incubation time and reaches a platform after 2.0

120 h, so the optimum incubation time of AS@Au NCs is selected as 2.0 h. Furthermore,  
 121 as shown in Fig. S3E, the PEC signal increases with the increase of the wavelength of  
 122 the excited light source, while the highest photocurrent is observed with the irradiation  
 123 of white light. So we choose the white light as the optimal light source throughout the  
 124 experiment.

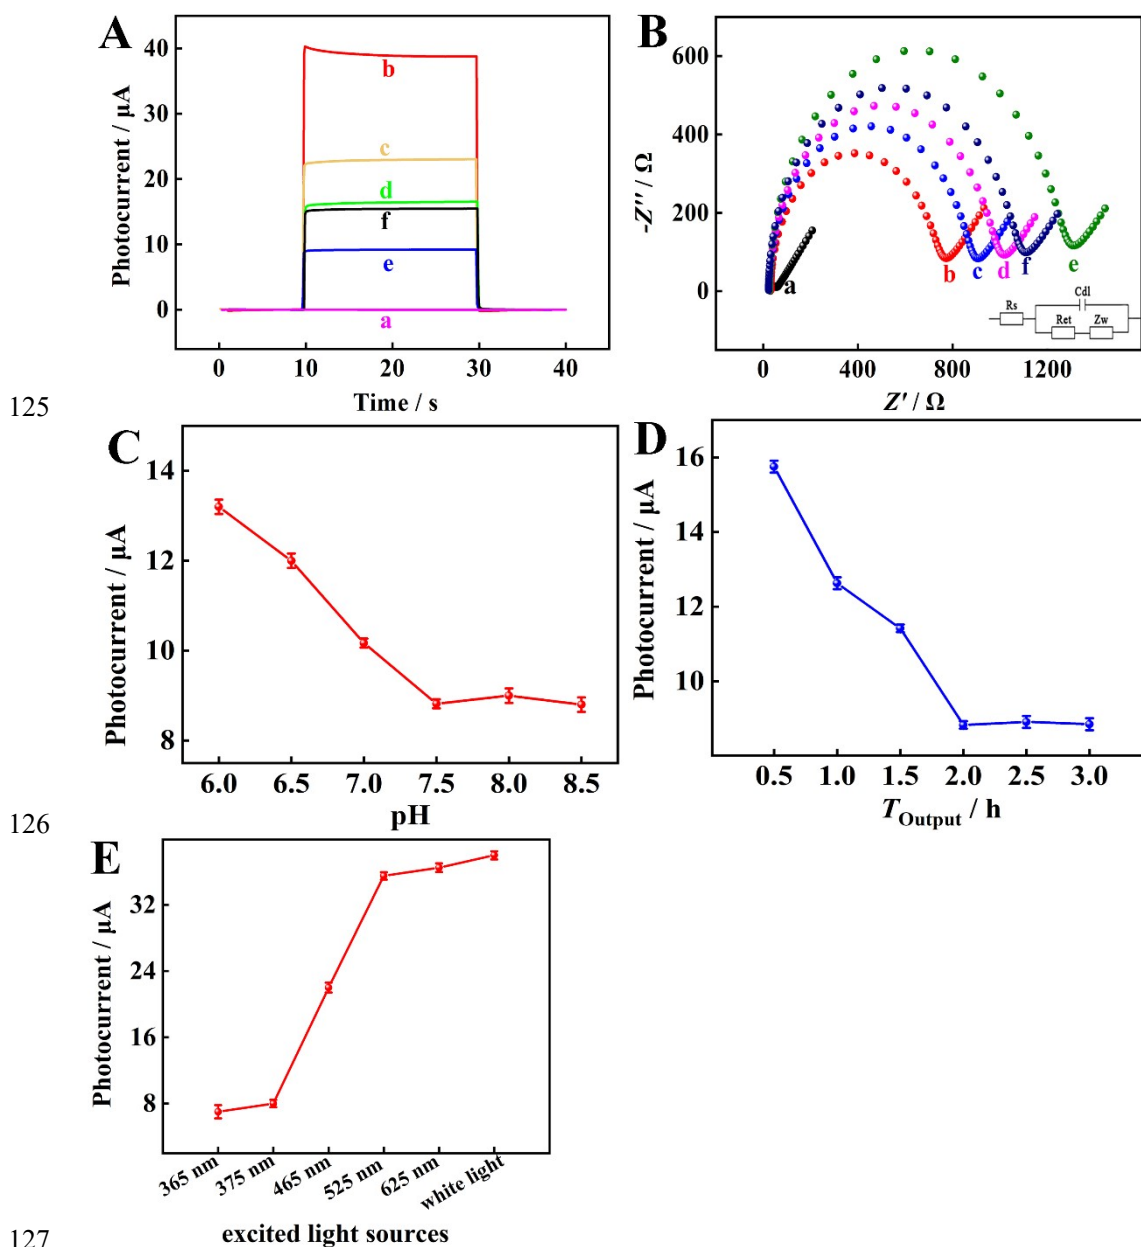

128 **Fig. S3.** (A) PEC responses and (B) EIS profiles (insert: equivalent circuit) of different modified  
 129 electrodes: (a) bared GCE, (b) Mg-PTCA MOFs / GCE, (c) Capture DNA / Mg-PTCA MOFs / GCE

130 (d) MCH / Capture DNA / Mg-PTCA MOFs / GCE, (e) AS @ Au NCs / MCH / Capture DNA /  
131 Mg-PTCA MOFs / GCE, (f) Regeneration DNA / AS @ Au NCs / MCH / Capture DNA / Mg-PTCA  
132 MOFs / GCE. The effects of (C) pH, (D) the incubation time of AS@Au NCs and (E) the  
133 wavelengths of excitation lights.

134

## 135 11. The effect of ZnO NPs and HNO<sub>3</sub>

136 In order to investigate the influence of ZnO NPs to the prepared PEC sensing  
137 platform, we have designed a contrast experiment by replacing AS@Au NCs  
138 (generated by destroying 3D-Sca) by themselves (curve a), AS@Au NCs (curve b) and  
139 ZnO NPs - H<sub>2</sub> - AS@Au NCs (curve c). As depicted in Fig. S4, the PEC response of  
140 the AS@Au NCs is close to the inherently experimental one. However, ZnO NPs - H<sub>2</sub>  
141 - AS@Au NCs exhibit a much higher PEC signal. The following conclusions can be  
142 drawn by the results above. First, ZnO NPs have been almost dissolved and its effect is  
143 negligible. Secondly, HNO<sub>3</sub> expresses good dissolving capacity to ZnO NPs and does  
144 not affect the subsequent detection performance.

145 In addition, we have investigated the change of pH value after the destroy of 3D-Sca.  
146 The pH of 3D-Sca solution is 7.53. After the addition of HNO<sub>3</sub>, the pH (7.44) is not  
147 nearly changed, which is close to the optimal pH of testing solution (pH 7.4). The  
148 possible reasons of the almost unchanged pH value may be the low concentration and  
149 the small amount of HNO<sub>3</sub>, and the excellent buffer capacity of PB solution. The results  
150 further demonstrate that HNO<sub>3</sub> does not affect the subsequent detection.

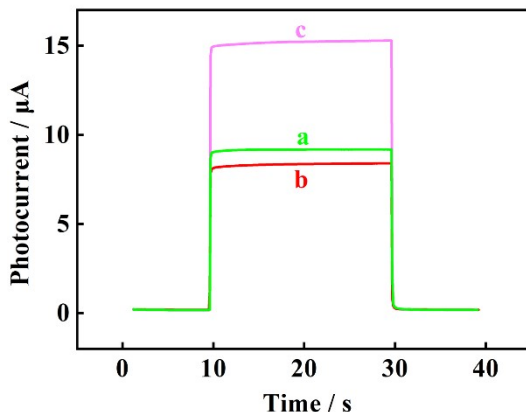

151

152 **Fig. S4.** The exploration of effect of ZnO NPs and HNO<sub>3</sub> to the proposed biosensor by replacing  
153 AS@Au NCs (generated by destroying 3D-Sca) by (a) themselves, (b) AS@Au NCs and (c) ZnO  
154 NPs - H<sub>2</sub> - AS@Au NCs.

155

156 **12. Comparison with other methods for miRNA 21 detection**

157 **Table S4.** Comparison of the miRNA 21 detection with other detection methodologies.

| Analytical method | Detection limit | Linear range    | Ref.      |
|-------------------|-----------------|-----------------|-----------|
| CEAM              | 55 fM           | 1 pM -10 nM     | 2         |
| SERS              | 0.34 fM         | 1.0 fM -10.0 nM | 3         |
| ECL               | 0.17 fM         | 0.5 fM - 10 pM  | 4         |
| SERS              | 3.5 fM          | 10 fM - 100 nM  | 5         |
| ECL               | 0.3 fM          | 1 fM - 10 pM    | 6         |
| DPV               | 0.78 fM         | 10 fM - 1 nM    | 7         |
| DPV               | 0.434 fM        | 10 fM - 1000 fM | 8         |
| PEC               | 2.8 aM          | 10 aM - 10 pM   | This work |

158 **Abbreviations:** cyclic enzymatic amplification method (CEAM); surface-enhanced Raman  
159 scattering (SERS); electrochemiluminescence (ECL); differential pulse voltammetry (DPV).

160



161 **13. Reference**

- 162 1. J. Li, W. Tu, H. Li, M. Han, Y. Lan, Z. Dai and J. Bao, *Anal. Chem.*, 2014, **86**, 1306-1312.
- 163 2. Q. Li, S. Zhou, T. Zhang, B. Zheng and H. Tang, *Biosens. Bioelectron.*, 2020, **150**, 111866-111874.
- 164 3. S. Wen, Y. Su, C. Dai, J. Jia, G.-C. Fan, L.-P. Jiang, R.-B. Song and J.-J. Zhu, *Anal. Chem.*, 2019, **91**, 12298-
- 165 12306.
- 166 4. L. Peng, Y. Yuan, X. Fu, A. Fu, P. Zhang, Y. Chai, X. Gan and R. Yuan, *Anal. Chem.*, 2019, **91**, 3239-3245.
- 167 5. J. Chen, Y. Wu, C. Fu, H. Cao, X. Tan, W. Shi and Z. Wu, *Biosens. Bioelectron.*, 2019, **143**, 111619-111626.
- 168 6. H. Shao, H. Lin, J. Lu, Y. Hu, S. Wang, Y. Huang and Z. Guo, *Biosens. Bioelectron.*, 2018, **118**, 247-252.
- 169 7. S. Su, W. Cao, W. Liu, Z. Lu, D. Zhu, J. Chao, L. Weng, L. Wang, C. Fan and L. Wang, *Biosens. Bioelectron.*,
- 170 2017, **94**, 552-559.
- 171 8. X. Sun, H. Wang, Y. Jian, F. Lan, L. Zhang, H. Liu, S. Ge and J. Yu, *Biosens. Bioelectron.*, 2018, **105**, 218-225.
- 172
